# Supplementary material for: Advances in new psychoactive substances identification: the U.R.I.To.N. Consortium
Source: PubMed Central journal article supplement (PMC6445230; doi:10.1080/14756366.2017.1333987), 2017-06-20
Supplement: IENZ_A_1333987_SM5160.pdf [file IENZ_A_1333987_SM5160.pdf]

## Supporting Informations for

### Advances in New Psychoactive Substances Identification: The U.R.I.To.N Consortium

**Elisabetta Bertol<sup>a</sup>, Fabio Vaiano<sup>a\*</sup>, Francesco Mari<sup>a</sup>, Maria Grazia Di Milia<sup>a</sup>, Silvia Bua<sup>b</sup>,  
Claudiu T. Supuran<sup>b,c</sup> and Fabrizio Carta.<sup>b,c\*</sup>**

<sup>a</sup> Forensic Toxicology Division, Department of Health Sciences, University of Florence, L.go Brambrilla 3, 50134, Florence Italy

<sup>b</sup> Università degli Studi di Firenze, Dipartimento Neurofarba, Sezione di Scienze Farmaceutiche, Polo Scientifico, Via U. Schiff 6, 50019 Sesto Fiorentino, Florence, Italy

<sup>c</sup> Università degli Studi di Firenze, Dipartimento di Chimica, Laboratorio di Chimica Bioinorganica, Rm. 188, Via della Lastruccia 3, 50019 Sesto Fiorentino (Florence), Italy.

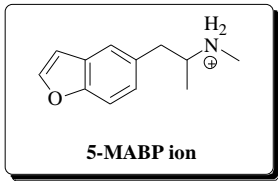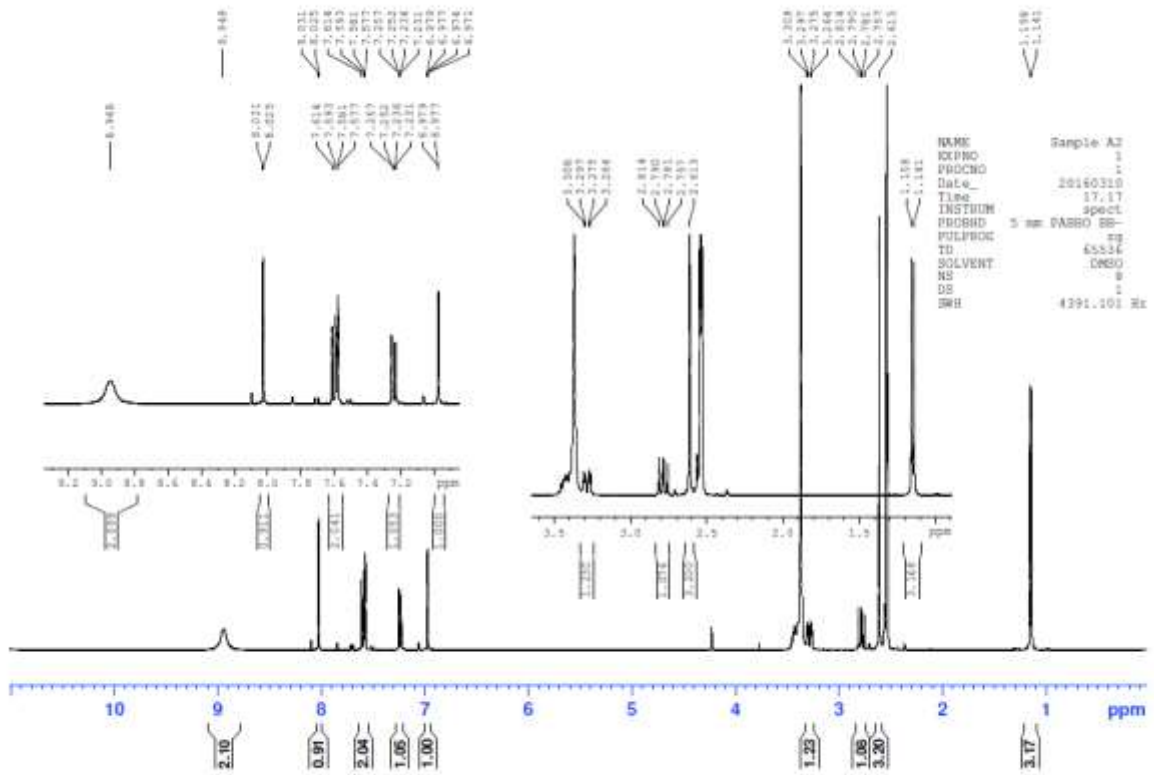



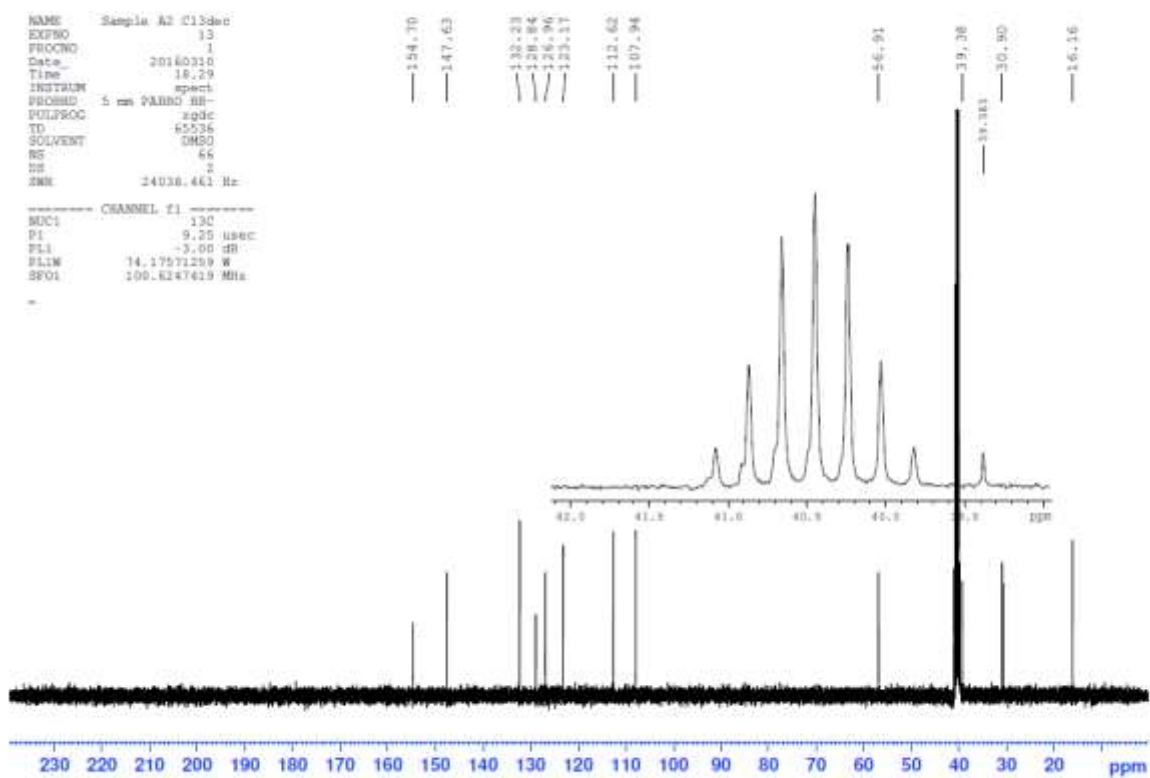

S3.  $^{13}\text{C}$ -NMR at 100MHz of 5-MABP ion in  $\text{DMSO-}d_6$

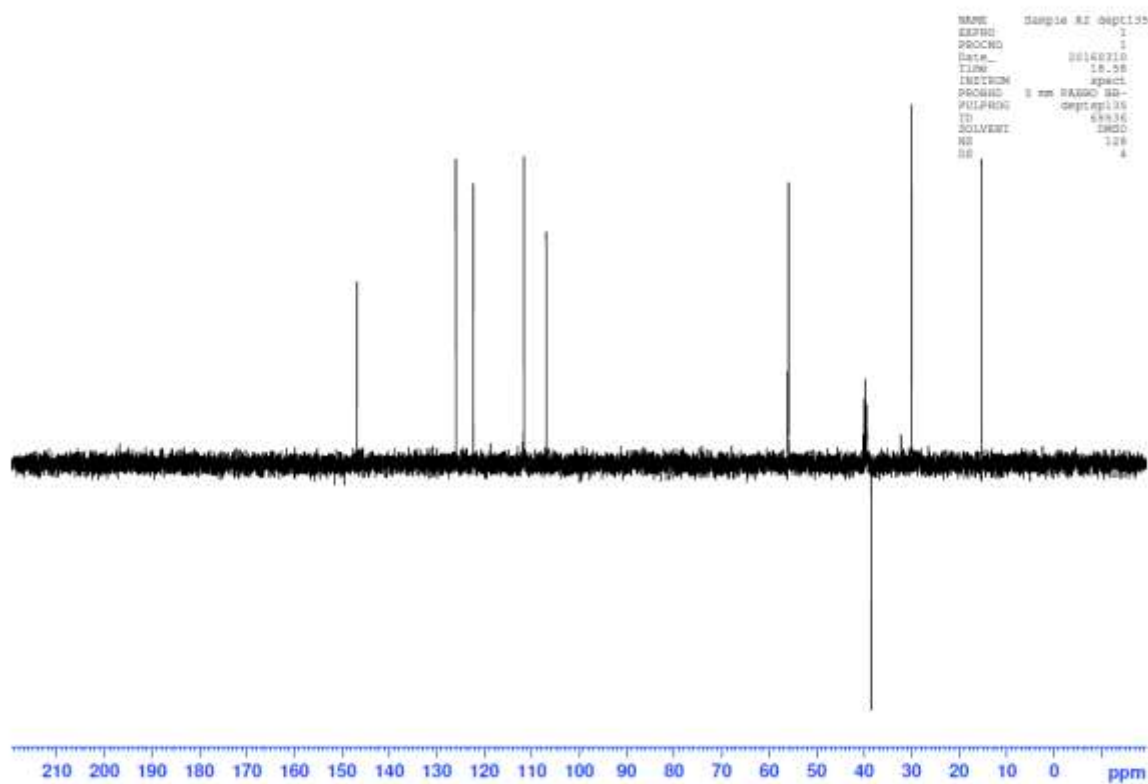

S4. DEPT-135 at 100MHz of 5-MABP ion in DMSO- $d_6$

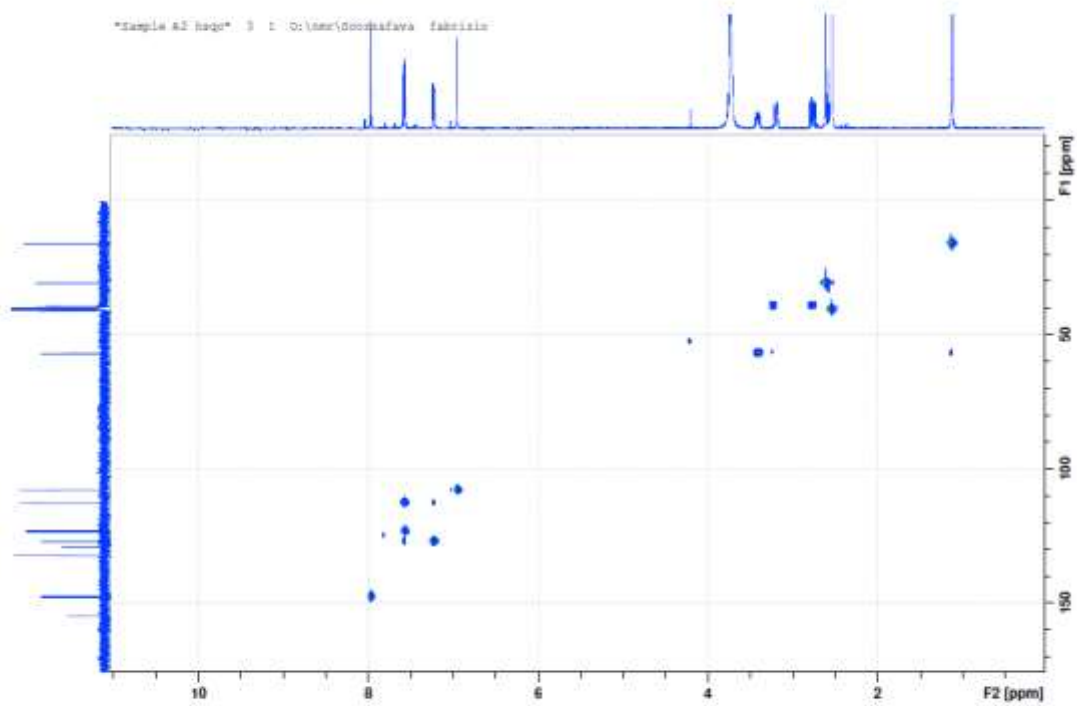

S5. HSQC of 5-MABP ion in DMSO- $d_6$

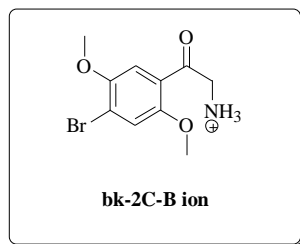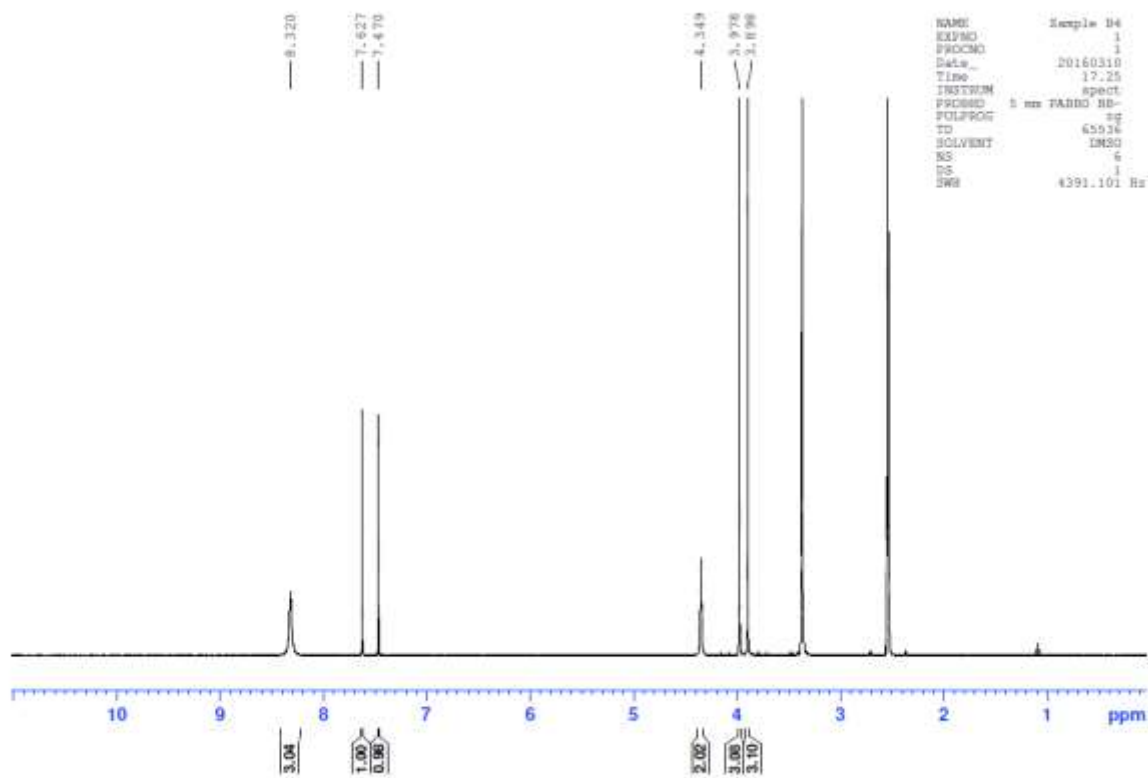

S6. <sup>1</sup>H-NMR at 400MHz of bk-2C-B ion in DMSO-*d*<sub>6</sub>

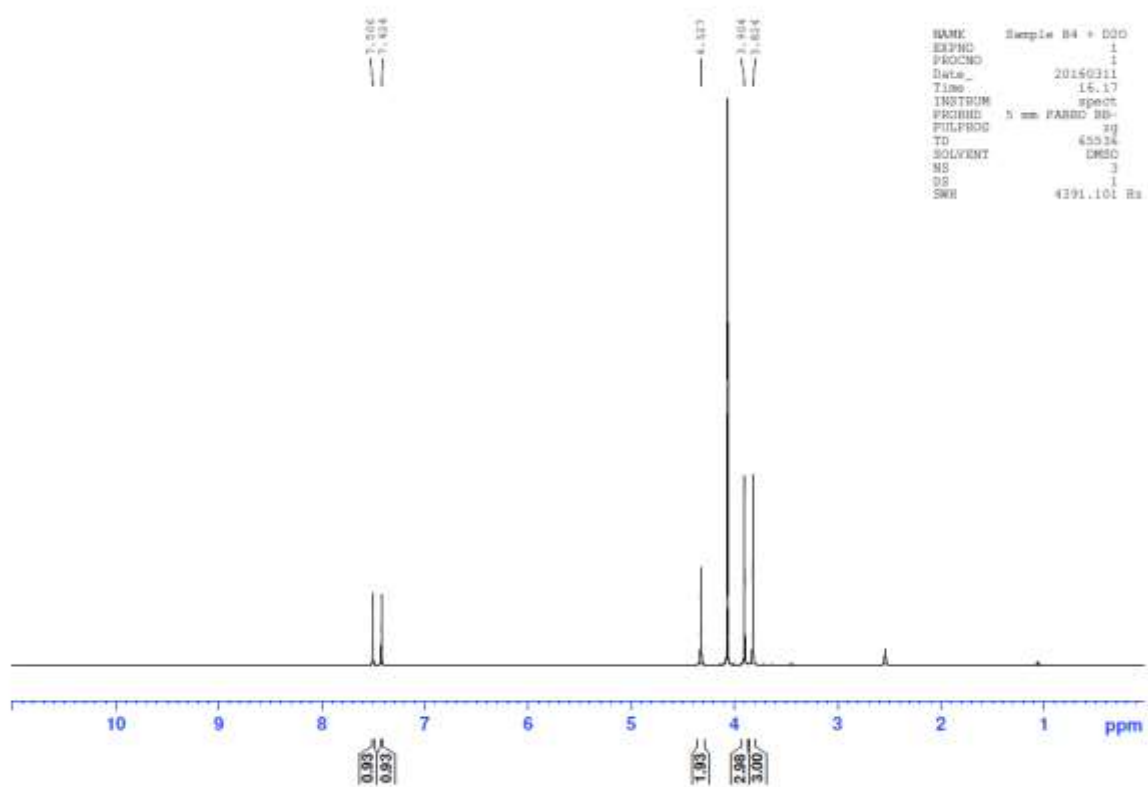

S7.  $^1\text{H-NMR} + \text{D}_2\text{O}$  at 400MHz of bk-2C-B ion in  $\text{DMSO-}d_6$



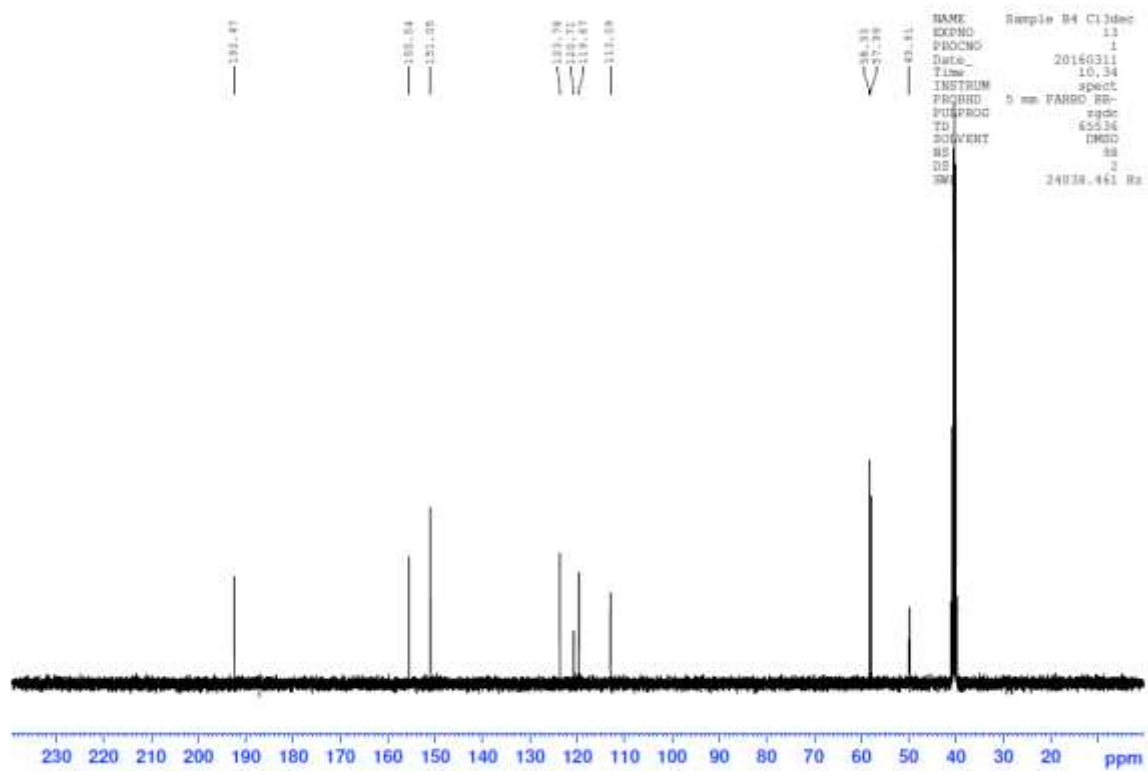

S8.  $^{13}\text{C}$ -NMR at 100MHz of bk-2C-B ion in  $\text{DMSO-}d_6$

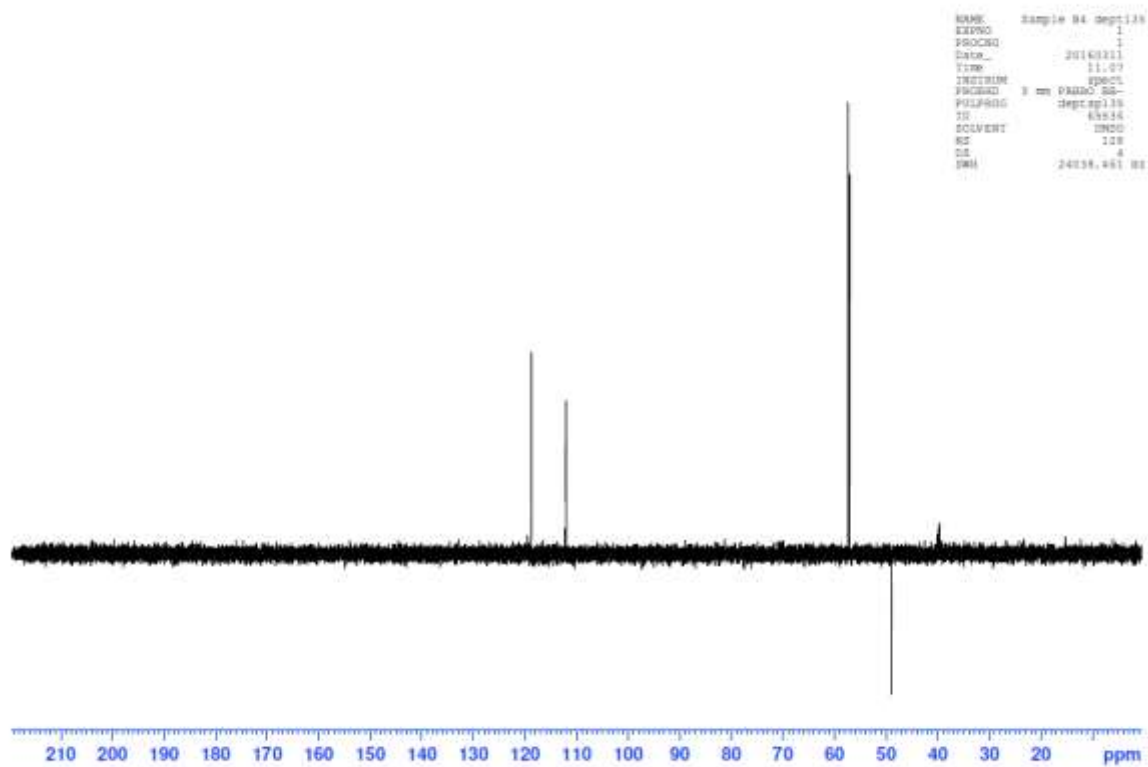

S9. DEPT-135-NMR at 100MHz of bk-2C-B ion in DMSO- $d_6$
